# Supplementary material for: Evolution of HLA-F and its orthologues in primate species: a complex tale of conservation, diversification and inactivation
Source: PubMed Central journal article supplement (PMC7725694; doi:10.1007/s00251-020-01187-1), 2020-11-12
Supplement: 251_2020_1187_MOESM2_ESM.pdf [file 251_2020_1187_MOESM2_ESM.pdf]

EXON 1

EXON 2

|                 | 10                                                              | 20                                        | 30          | 40       | 50      | 60     | 70          | 80     | 90     | 100       |
|-----------------|-----------------------------------------------------------------|-------------------------------------------|-------------|----------|---------|--------|-------------|--------|--------|-----------|
| HLA-F*01:01     | ATGGCGCCCGAAGCCTCCTCCTGCTGCTCTCAGGGGCCCTGGCCCTGACCGATACTTGGGCGG | GCTCCCACTCCTTGAGGTATTTTCAGCACCGCTGTGTCGGC |             |          |         |        |             |        |        |           |
| HLA-F*01:02     | .....                                                           | .....                                     | .....       | T.....   | .....   | .....  | .....       | .....  | .....  | .....     |
| Patr-F*01:01:02 | .....                                                           | .....                                     | T.....      | .....    | .....   | G..... | a.....      | .....  | .....  | .....     |
| Patr-F*01:02:01 | .....                                                           | .....                                     | .....       | .....    | .....   | G..... | a.....      | .....  | .....  | .....     |
| Patr-F*01:03    | .....                                                           | .....                                     | T.....      | .....    | .....   | G..... | a.....      | .....  | G..... | .....     |
| Papa-F AF084027 | .....                                                           | .....                                     | .....       | .....    | .....   | G..... | a.....      | .....  | .....  | .....     |
| Gogo-F*01:01    | .....                                                           | .....                                     | T.....      | .....    | A.....  | G..... | a.....      | .....  | .....  | .....     |
| Gogo-F*01:03    | .....                                                           | .....                                     | T.....      | .....    | A.....  | G..... | a.....      | .....  | .....  | .....     |
| Poab-F*01:01:01 | .....                                                           | C.....                                    | .....       | .....    | .....   | G..... | c.....      | .....  | .....  | .....     |
| Popy-F*01:01:02 | .....                                                           | C.....                                    | .....       | .....    | .....   | G..... | c.....      | .....  | .....  | .....     |
| Mamu-F*02:01    | .....                                                           | C.....                                    | G.....      | .....    | .....   | G..... | c.....      | .....  | c..... | t.....    |
| Mamu-F*02:02    | .....                                                           | C.....                                    | G.....      | .....    | .....   | G..... | c.....      | .....  | c..... | t.....    |
| Mafa-F*02:02:01 | .....                                                           | C.....                                    | G.....      | .....    | .....   | G..... | c.....      | .....  | c..... | t.....    |
| Mafa-F*02:03:01 | .....                                                           | C.....                                    | G.....      | .....    | .....   | G..... | c.....      | .....  | c..... | t.....    |
| Mane-F*02:01:01 | .....                                                           | a.....                                    | C.....      | G.....   | .....   | G..... | c.....      | .....  | c..... | t.....    |
| Mane-F*02:02:01 | .....                                                           | a.....                                    | C.....      | G.....   | .....   | G..... | c.....      | .....  | c..... | t.....    |
| Paan-F*02:01:01 | .....                                                           | a.....                                    | C.....      | G.....   | .....   | G..... | c.....      | .....  | c..... | t.....    |
| Paan-F*02:02    | .....                                                           | a.....                                    | C.....      | G.....   | .....   | G..... | c.....      | .....  | c..... | t.....    |
| Ceat-F*02:01    | -----                                                           | -----                                     | -----       | G.....   | .....   | G..... | c.....      | .....  | c..... | t.....    |
| Ceat-F*02:02    | -----                                                           | -----                                     | -----       | G.....   | .....   | G..... | c.....      | .....  | c..... | t.....    |
| Saoe-F*03:02    | .....                                                           | C.....                                    | .....       | TG.....  | A.....  | G..... | c.....      | .....  | t..... | t.cA..... |
| Saoe-F*03:03    | .....                                                           | C.....                                    | .....       | TG.....  | A.....  | G..... | c.....      | .....  | t..... | t.cA..... |
| Saoe-F*03:04    | .....                                                           | C.....                                    | .....       | TG.....  | A.....  | G..... | c.....      | .....  | t..... | t.cA..... |
| Aole-F*05:01    | .....                                                           | a.aG...C.....                             | .....       | g.....   | a.....  | G..... | c.....      | t..... | A..... | G.....    |
| Aole-F*05:02    | .....                                                           | a.aG...C.....                             | .....       | g.....   | a.....  | G..... | c.....      | t..... | A..... | G.....    |
| Aole-F*05:03    | .....                                                           | a.aG...C.....                             | .....       | g.....   | a.....  | G..... | c.....      | t..... | A..... | G.....    |
| Aole-F*05:04    | .....                                                           | a.aG...C.....                             | .....       | g.....   | a.....  | G..... | c.....      | t..... | A..... | G.....    |
| Aole-F*05:05    | .....                                                           | a.aG...C.....                             | .....       | g.....   | a.....  | G..... | c.....      | t..... | A..... | G.....    |
| Caja-F4*04:01   | .....                                                           | a.a...C.....                              | .....       | t.t..... | .....   | G..... | G.cCA.....  | .....  | .....  | G.....    |
| Caja-F4*04:03   | .....                                                           | a.a...CT.....                             | .....       | t.t..... | .....   | G..... | G.cCA.....  | .....  | .....  | G.....    |
| Caja-F4*04:06   | .....                                                           | a.a...C.....                              | .....       | t.t..... | .....   | G..... | G.cCA.....  | .....  | .....  | G.....    |
| Caja-F4*04:07   | .....                                                           | a.a...C.....                              | .....       | t.t..... | .....   | G..... | G.cCA.....  | .....  | .....  | G.....    |
| Caja-F6*06:01   | .....                                                           | a.a...C.....                              | .....       | t.t..... | .....   | .....  | G.cC.T..... | .....  | .....  | G.....    |
| Caja-F6*06:02   | .....                                                           | a.a...C.....                              | .....       | t.t..... | .....   | .....  | G.cC.T..... | .....  | .....  | G.....    |
| Caja-F5*04:02N  | .....                                                           | a.a...C.....                              | .....       | t.t..... | .....   | G..... | G.cCA.....  | .....  | .....  | G.....    |
| Caja-F5*04:04N  | .....                                                           | a.a...C.....                              | .....       | t.t..... | .....   | .....  | G.cCA.....  | .....  | .....  | G.....    |
| Caja-F5*04:05N  | .....                                                           | a.a.T...C.....                            | .....       | t.t..... | .....   | G..... | G.cCA.....  | .....  | .....  | G.....    |
| Caja-F7*07:01N  | .....                                                           | a.a...T.....                              | .....       | t.t..... | .....   | .....  | G.cCA.....  | .....  | .....  | G.....    |
| Caja-F1*08:01N  | .....                                                           | A.....                                    | CG...T..... | a.....   | TG..... | A..... | G.....      | c..... | T..... | A.c.....  |
| Caja-F1*08:02N  | .....                                                           | A.....                                    | CG...T..... | a.....   | TG..... | A..... | G.....      | c..... | T..... | A.c.....  |

EXON 2

|                 | 110                | 120    | 130                                                                             | 140   | 150     | 160    | 170         | 180   | 190     | 200   |
|-----------------|--------------------|--------|---------------------------------------------------------------------------------|-------|---------|--------|-------------|-------|---------|-------|
|                 | :---               | ---    | :---                                                                            | ---   | :---    | ---    | :---        | ---   | :---    | ---   |
| HLA-F*01:01     | GCCCGGCCCGGGGAGCCC | ---    | CGCTACATCGCCGTGGAGTACGTAGACGACACGCAATTCCTGCGGTTCGACAGCGACGCCGCGATTCCGAGGATGGAGC |       |         |        |             |       |         |       |
| HLA-F*01:02     | .....              | -----  | .....                                                                           | ..... | .....   | .....  | .....       | ..... | .....   | ..... |
| Patr-F*01:01:02 | .....              | -----  | .g                                                                              | ..... | .....   | .g     | .....       | ..... | .....   | ..... |
| Patr-F*01:02:01 | .....              | -----  | .g                                                                              | ..... | .....   | .g     | .....       | ..... | .....   | ..... |
| Patr-F*01:03    | .....              | -----  | .g                                                                              | ..... | .....   | .g     | .....       | ..... | .....   | ..... |
| Papa-F AF084027 | .....              | -----  | .g                                                                              | ..... | .....   | .g     | .....       | ..... | .....   | ..... |
| Gogo-F*01:01    | .....              | -----  | .g                                                                              | ..... | .....   | .g     | .....       | ..... | .....   | ..... |
| Gogo-F*01:03    | .....              | -----  | .g                                                                              | ..... | .....   | a.g    | .....       | ..... | .....   | ..... |
| Poab-F*01:01:01 | .....              | -----  | .g                                                                              | ..... | .g      | .....  | .g          | ..... | t       | ..... |
| Popy-F*01:01:02 | .....              | -----  | .g                                                                              | ..... | .g      | .....  | .g          | ..... | t       | ..... |
| Mamu-F*02:01    | .....              | A..... | tCGGTACa.g                                                                      | ..... | .g      | .....  | .g          | ..... | .....   | ..... |
| Mamu-F*02:02    | .....              | A..... | tCAGTACa.g                                                                      | ..... | .g      | .....  | .g          | ..... | .....   | ..... |
| Mafa-F*02:02:01 | .....              | A..... | tCAGTACa.g                                                                      | ..... | .g      | .....  | .g          | ..... | .....   | ..... |
| Mafa-F*02:03:01 | .....              | A..... | tCAGTACa.g                                                                      | ..... | .g      | .....  | .g          | ..... | .....   | ..... |
| Mane-F*02:01:01 | .....              | A..... | tCGGTACa.g                                                                      | ..... | .g      | .....  | .g          | ..... | .....   | ..... |
| Mane-F*02:02:01 | .....              | A..... | tCGGTACa.g                                                                      | ..... | .g      | .....  | .g          | ..... | .....   | ..... |
| Paan-F*02:01:01 | .....              | A..... | tCGGTACa.g                                                                      | ..... | .g      | .....  | .g          | ..... | .....   | ..... |
| Paan-F*02:02    | ..g                | A..... | tCGGTACa.g                                                                      | ..... | .g      | .....  | .g          | ..... | .....   | ..... |
| Ceat-F*02:01    | .....              | A..... | tCGGTACa.g                                                                      | ..... | .g      | .....  | .g          | ..... | .....   | ..... |
| Ceat-F*02:02    | .....              | A..... | tCGGTACa.g                                                                      | ..... | .g      | .....  | .g          | ..... | .....   | ..... |
| Saoe-F*03:02    | ..t                | .....  | CGATACa.g                                                                       | ..... | GA...GC | ...g.t | ...TG...G.a | ..... | A.C...G | ..... |
| Saoe-F*03:03    | ..t                | .....  | CGATACa.g                                                                       | ..... | GA...GC | ...g.t | ...TG...G.a | ..... | A.C...G | ..... |
| Saoe-F*03:04    | ..t                | .....  | CGATACa.g                                                                       | ..... | GA...GC | ...g.t | ...TG...G.a | ..... | A.C...G | ..... |
| Aole-F*05:01    | ..t                | ...C   | CGATACa.g                                                                       | ..... | a...GC  | ...g   | ...TG...A   | ..... | t       | ..... |
| Aole-F*05:02    | ..t                | ...C   | CGATACa.g                                                                       | ..... | a...GC  | ...g   | ...TG...A   | ..... | t       | ..... |
| Aole-F*05:03    | ..t                | ...CA  | CGATACa.g                                                                       | ..... | a...GC  | ...g   | ...TG...A   | ..... | t       | ..... |
| Aole-F*05:04    | ..t                | ...C   | CGATACa.g                                                                       | ..... | a...GC  | ...g   | ...TG...A   | ..... | t       | ..... |
| Aole-F*05:05    | ..t                | ...C   | CGATACa.g                                                                       | ..... | a...GC  | ...g   | ...TG...A   | ..... | t       | ..... |
| Caja-F4*04:01   | ..t                | .....  | T. AGATACa.g                                                                    | ..... | a...GC  | ...g   | ...g        | ..... | A       | ..... |
| Caja-F4*04:03   | ..t                | .....  | T. AGATACa.g                                                                    | ..... | a...GC  | ...g   | ...g        | ..... | A       | ..... |
| Caja-F4*04:06   | ..t                | .....  | T. AGATACa.g                                                                    | ..... | a...GC  | ...g   | ...g        | ..... | A       | ..... |
| Caja-F4*04:07   | ..t                | .....  | T. AGATACa.g                                                                    | ..... | a...GC  | ...g   | ...g        | ..... | A       | ..... |
| Caja-F6*06:01   | ..t                | .....  | T. AGATACa.g                                                                    | ..... | a...GC  | ...g   | ...g        | ..... | A       | ..... |
| Caja-F6*06:02   | ..t                | .....  | T. AGATACa.g                                                                    | ..... | a...GC  | ...g   | ...g        | ..... | A       | ..... |
| Caja-F5*04:02N  | ..t                | .....  | T. AGATACa.g                                                                    | ..... | a...GC  | ...g   | ...g        | ..... | t       | ..... |
| Caja-F5*04:04N  | ..t                | .....  | T. AGATACa.g                                                                    | ..... | a...GT  | ...g   | ...g        | ..... | A       | ..... |
| Caja-F5*04:05N  | ..t                | .....  | T. AGATACa.g                                                                    | ..... | a...GC  | ...g   | ...g        | ..... | t       | ..... |
| Caja-F7*07:01N  | ..t                | .....  | T. AGATACa.g                                                                    | ..... | a...GC  | ...g   | T           | ..... | t       | ..... |
| Caja-F1*08:01N  | .....              | T      | CGATACa.g                                                                       | ..... | GA...GC | ...g   | ...gA.G     | ..... | G       | ..... |
| Caja-F1*08:02N  | .....              | T      | CGATACa.g                                                                       | ..... | GA...GC | ...g   | ...gA.G     | ..... | G       | ..... |

EXON 2

|                 | 210                                                                                                       | 220    | 230      | 240    | 250                    | 260         | 270    | 280    | 290             | 300     |
|-----------------|-----------------------------------------------------------------------------------------------------------|--------|----------|--------|------------------------|-------------|--------|--------|-----------------|---------|
| HLA-F*01:01     | CGCGGGAGCCCGTGGGTGGAGCAAGAGGGGGCCGAGTATTGGGAGTGGACCACAGGGTACGCCAAGGCCAACGCACAGACTGACCGAGTGGCCCTGAGGAACCTG |        |          |        |                        |             |        |        |                 |         |
| HLA-F*01:02     | .....                                                                                                     | .....  | .....    | .....  | .....                  | .....       | .....  | .....  | .....           | .....   |
| Patr-F*01:01:02 | .t.....                                                                                                   | .....  | .....    | .....  | A.....                 | .....       | g..... | .....  | .....           | .....   |
| Patr-F*01:02:01 | .t.....                                                                                                   | .....  | .....    | .....  | A.....                 | a.....      | g..... | .....  | .....           | .....   |
| Patr-F*01:03    | .t.....                                                                                                   | .....  | .....    | .....  | aA.....                | .....       | g..... | .....  | .....           | .....   |
| Papa-F AF084027 | .t.....                                                                                                   | .....  | .....    | .....  | A.....                 | a.....      | g..... | .....  | .....           | .....   |
| Gogo-F*01:01    | .t.....                                                                                                   | .....  | c.....   | .....  | A.....                 | .....       | .....  | .....  | .....           | .....   |
| Gogo-F*01:03    | .t.....                                                                                                   | .....  | .....    | .....  | A.....                 | .....       | .....  | a..... | .....           | .....   |
| Poab-F*01:01:01 | .....C.....                                                                                               | .....  | .....    | .....  | .....                  | .....       | .....  | .....  | .....A.....     | .....   |
| Popy-F*01:01:02 | .....C.....                                                                                               | .....  | .....    | .....  | .....                  | .....       | .....  | .....  | .....           | A.....  |
| Mamu-F*02:01    | .....C.....                                                                                               | .....  | .....    | .....  | .....                  | .....       | .....  | G..... | .....           | G.....  |
| Mamu-F*02:02    | .....a.C.....                                                                                             | .....  | .....    | .....  | C.....                 | .....       | .....  | G..... | .....           | G.....  |
| Mafa-F*02:02:01 | .....a.C.....                                                                                             | .....  | .....    | .....  | C.....                 | .....       | .....  | G..... | .....           | G.....  |
| Mafa-F*02:03:01 | .....a.C.....                                                                                             | .....  | .....    | .....  | C.....                 | .....       | .....  | G..... | .....           | G.....  |
| Mane-F*02:01:01 | .....C.....                                                                                               | .....  | .....    | .....  | C.....                 | .....       | .....  | G..... | .....           | G.....  |
| Mane-F*02:02:01 | .....C.....                                                                                               | .....  | .....    | .....  | C.....                 | .....       | .....  | G..... | .....           | G.....  |
| Paan-F*02:01:01 | .....a.C.....                                                                                             | .....  | .....    | .....  | C.....                 | .....       | .....  | G..... | .....           | G.....  |
| Paan-F*02:02    | .....a.C.....                                                                                             | a..... | .....    | .....  | C.....                 | .....       | .....  | G..... | .....           | G.....a |
| Ceat-F*02:01    | .....a.C.A.....                                                                                           | .....  | a.....   | .....  | C.....                 | .....       | .....  | G..... | .....           | G.....  |
| Ceat-F*02:02    | .....a.C.....                                                                                             | .....  | a.....   | .....  | C.....                 | .....       | .....  | G..... | .....           | G.....  |
| Saoe-F*03:02    | .....C.....                                                                                               | g..... | A.....   | G..... | GACCAG...C.GT..T.....  | .....       | .....  | .....  | AAA.....c.....  | A.....  |
| Saoe-F*03:03    | .....C.....                                                                                               | g..... | A.....   | G..... | GACCAG...C.GT..T.....  | .....       | .....  | .....  | AAA.....c.....  | A.....  |
| Saoe-F*03:04    | .....C.....                                                                                               | g..... | A.....   | G..... | GACCAG...C.GT..T.....  | .....       | .....  | .....  | AAAA.....c..... | A.....  |
| Aole-F*05:01    | .....C.....                                                                                               | g..... | A.....   | G..... | CC.-----G.G.T.....     | .....       | a..... | .....  | AA.....c.....   | T.....  |
| Aole-F*05:02    | .....C.....                                                                                               | g..... | A.....   | G..... | CC.-----G.G.T.....     | .....       | a..... | .....  | AA.....c.....   | T.....  |
| Aole-F*05:03    | .....C.....                                                                                               | g..... | A.....   | G..... | CC.-----G.G.T.....     | .....       | a..... | .....  | AA.....c.....   | T.....  |
| Aole-F*05:04    | .....C.....                                                                                               | g..... | A.....   | G..... | CC.-----G.G.T.....     | .....       | a..... | .....  | AA.....c.....   | T.....  |
| Aole-F*05:05    | .....C.....                                                                                               | g..... | A.....   | G..... | CC.-----G.G.T.....     | .....       | a..... | .....  | AA.....c.....   | T.....  |
| Caja-F4*04:01   | .....C.....                                                                                               | g..... | A.A..... | G..... | CC.-----G.G.T.....     | AG.G.....   | a..... | a..... | aAA.....c.....  | T.....  |
| Caja-F4*04:03   | .....CA.....                                                                                              | g..... | A.....   | G..... | CC.-----G.G.T.....     | AG.G.....   | a..... | .....  | aAA.....c.....  | T.....  |
| Caja-F4*04:06   | .....C.....                                                                                               | g..... | A.A..... | G..... | CC.-----G.G.T.....     | AG.G.....   | a..... | .....  | aAA.....c.....  | T.....  |
| Caja-F4*04:07   | .....C.....                                                                                               | g..... | A.....   | G..... | CC.-----G.G.T.....     | AG.G.....   | a..... | .....  | aAA.....c.....  | T.....  |
| Caja-F6*06:01   | .....C.....                                                                                               | g..... | A.....   | G..... | CC.-----G.G.T.....     | AG.G.....   | a..... | .....  | aAA.....c.....  | T.....  |
| Caja-F6*06:02   | .....C.A.....                                                                                             | g..... | A.....   | G..... | CC.-----G.G.T.....     | AG.G.....   | a..... | .....  | aAA.....c.....  | T.....  |
| Caja-F5*04:02N  | .....C.....                                                                                               | g..... | A.....   | G..... | C.-----G.G.T.....      | a.AG.T..... | a..... | .....  | AA.....c.....   | T.....  |
| Caja-F5*04:04N  | .....CA.....                                                                                              | g..... | A.....   | G..... | CC.-----G.G.T.....     | AG.G.....   | a..... | .....  | aAA.....c.....  | T.....  |
| Caja-F5*04:05N  | .....C.....                                                                                               | g..... | A.....   | G..... | C.-----G.G.T.....      | a.AG.T..... | a..... | .....  | AA.....c.....   | T.....  |
| Caja-F7*07:01N  | .....C.....                                                                                               | g..... | A.....   | G..... | C.-----G.G.T.....      | a.AG.G..... | a..... | .....  | AA.....c.....   | T.....  |
| Caja-F1*08:01N  | .....CA.....                                                                                              | g..... | .....    | G..... | GA.GAG...CT.GTA.T..... | G.....      | a..... | a..... | AAA.....c.....  | T.GCT   |
| Caja-F1*08:02N  | .....CA.....                                                                                              | g..... | .....    | G..... | GA.GAG...CT.GTA.T..... | G.....      | a..... | a..... | AAA.....c.....  | T.GCT   |

EXON 3

|                 | 310                          | 320     | 330      | 340                                         | 350     | 360     | 370     | 380                              | 390    | 400    | 410    |
|-----------------|------------------------------|---------|----------|---------------------------------------------|---------|---------|---------|----------------------------------|--------|--------|--------|
| HLA-F*01:01     | CTCCGCCGCTACAACCAGAGCGAGGCTG |         |          | GGTCTCACACCTCCAGGGAATGAATGGCTGCGACATGGGGCCC |         |         |         | GACGGACGCCTCCTCCGCGGGTATCACCAGCA |        |        |        |
| HLA-F*01:02     | .....                        | .....   | .....    | .....                                       | .....   | .....   | .....   | .....                            | .....  | .....  | .....  |
| Patr-F*01:01:02 | .....                        | .....   | .....c   | .....                                       | .....   | .....   | .....   | .....                            | .....t | .....  | .....  |
| Patr-F*01:02:01 | .....                        | .....   | .....c   | .....                                       | .....   | .....   | .....   | .....                            | .....  | .....  | .....  |
| Patr-F*01:03    | .....                        | .....   | .....c   | .....                                       | .....   | .....   | .....   | .....                            | .....  | .....  | .....  |
| Papa-F AF084027 | .....                        | .....   | .....c   | .....                                       | .....   | .....   | .....   | .....                            | .....  | .....  | .....  |
| Gogo-F*01:01    | .....                        | .....   | .....c   | .....                                       | .....   | .....   | .....   | .....                            | .....t | .....  | .....  |
| Gogo-F*01:03    | .....                        | .....   | .....c   | .....                                       | .....   | .....   | .....   | .....                            | .....t | .....  | .....  |
| Poab-F*01:01:01 | .....                        | .....   | .....c   | .....a                                      | .....   | .....   | .....   | .....                            | .....  | .....  | .....  |
| Popy-F*01:01:02 | .....                        | .....   | .....c   | .....a                                      | .....   | .....   | .....   | .....                            | .....  | .....  | .....  |
| Mamu-F*02:01    | .....T                       | .....   | .....a   | .....                                       | .....   | .....c  | .....   | .....                            | .....  | .....  | .....  |
| Mamu-F*02:02    | .....T                       | .....   | .....c   | .....                                       | .....   | .....c  | .....   | .....                            | .....  | .....  | .....  |
| Mafa-F*02:02:01 | .....T                       | .....   | .....c   | .....                                       | .....   | .....   | .....   | .....                            | .....  | .....  | .....  |
| Mafa-F*02:03:01 | .....T                       | .....   | .....c   | .....                                       | .....   | .....c  | .....   | .....t                           | .....  | .....  | .....  |
| Mane-F*02:01:01 | .....T                       | .....   | .....c   | .....                                       | .....   | .....c  | .....   | .....                            | .....  | .....  | .....  |
| Mane-F*02:02:01 | .....T                       | .....   | .....c   | .....                                       | .....   | .....c  | .....   | .....                            | .....  | .....  | .....  |
| Paan-F*02:01:01 | .....T                       | .....a  | .....    | .....c                                      | .....   | .....   | .....   | .....                            | .....  | .....  | .....  |
| Paan-F*02:02    | .....T                       | .....a  | .....    | .....c                                      | .....   | .....   | .....   | .....                            | .....  | .....  | .....  |
| Ceat-F*02:01    | .....T                       | .....a  | .....    | .....c                                      | .....   | .....   | .....   | .....                            | .....  | .....  | .....  |
| Ceat-F*02:02    | .....T                       | .....a  | .....    | .....c                                      | .....   | .....   | .....   | .....                            | .....  | .....  | .....  |
| Saoe-F*03:02    | .....TA                      | .....t  | .....GC  | .....                                       | .....   | .....C  | .....tG | .....a                           | .....t | .....T | .....a |
| Saoe-F*03:03    | .....TA                      | .....t  | .....GC  | .....                                       | .....   | .....C  | .....tG | .....a                           | .....t | .....T | .....a |
| Saoe-F*03:04    | .....TA                      | .....t  | .....GC  | .....                                       | .....   | .....C  | .....tG | .....a                           | .....t | .....T | .....a |
| Aole-F*05:01    | .....TA                      | .....   | .....    | .....                                       | .....   | .....   | .....tG | .....a                           | .....t | .....T | .....a |
| Aole-F*05:02    | .....TA                      | .....   | .....    | .....                                       | .....   | .....   | .....tG | .....a                           | .....t | .....T | .....a |
| Aole-F*05:03    | .....TA                      | .....   | .....    | .....                                       | .....   | .....   | .....tG | .....a                           | .....t | .....T | .....a |
| Aole-F*05:04    | .....TA                      | .....   | .....    | .....                                       | .....   | .....   | .....tG | .....a                           | .....t | .....T | .....a |
| Aole-F*05:05    | .....TA                      | .....   | .....    | .....                                       | .....   | .....   | .....tG | .....a                           | .....t | .....T | .....a |
| Caja-F4*04:01   | .....TA                      | .....   | .....A.C | .....                                       | .....g  | .....   | .....tG | .....a                           | .....g | .....t | .....T |
| Caja-F4*04:03   | .....TA                      | .....   | .....A.C | .....                                       | .....AG | .....   | .....tG | .....a                           | .....g | .....t | .....T |
| Caja-F4*04:06   | .....TA                      | .....   | .....A.C | .....                                       | .....AG | .....   | .....tG | .....a                           | .....g | .....t | .....T |
| Caja-F4*04:07   | .....TA                      | .....   | .....A.C | .....                                       | .....g  | .....   | .....tG | .....a                           | .....g | .....t | .....T |
| Caja-F6*06:01   | .....TA                      | .....   | .....A.C | .....                                       | .....g  | .....   | .....tG | .....a                           | .....t | .....T | .....T |
| Caja-F6*06:02   | .....TA                      | .....   | .....A.C | .....                                       | .....g  | .....   | .....tG | .....a                           | .....t | .....T | .....T |
| Caja-F5*04:02N  | .....TA                      | .....   | .....A.C | .....                                       | .....-- | .....T  | .....tG | .....a                           | .....g | .....t | .....T |
| Caja-F5*04:04N  | .....TA                      | .....   | .....A.C | .....                                       | .....   | .....   | .....   | .....                            | .....  | .....  | .....  |
| Caja-F5*04:05N  | .....TA                      | .....   | .....A.C | .....                                       | .....-- | .....T  | .....tG | .....a                           | .....g | .....t | .....T |
| Caja-F7*07:01N  | .....TA                      | .....   | .....ATC | .....                                       | .....AG | .....   | .....tG | .....A                           | .....a | .....t | .....T |
| Caja-F1*08:01N  | .....G                       | .....TA | .....    | .....c                                      | .....   | .....-- | .....A  | .....tG                          | .....a | .....t | .....A |
| Caja-F1*08:02N  | .....G                       | .....TA | .....    | .....c                                      | .....   | .....-- | .....A  | .....tG                          | .....a | .....t | .....A |



EXON 3

|                 | 520                                                                                              | 530   | 540    | 550   | 560    | 570   | 580      | 590    | 600   | 610    |          |
|-----------------|--------------------------------------------------------------------------------------------------|-------|--------|-------|--------|-------|----------|--------|-------|--------|----------|
|                 | :---                                                                                             | ---   | :---   | ---   | :---   | ---   | :---     | ---    | :---  | ---    | :---     |
| HLA-F*01:01     | AATATGCAGAGGAGTTTCAGGACCTACCTGGAGGGCGAGTGCCTGGAGTTGCTCCGCAGATACTTGGAGAATGGGAAGGAGACGCTACAGCGGCAG |       |        |       |        |       |          |        |       |        | ATCCTCCA |
| HLA-F*01:02     | .....                                                                                            | ..... | .....  | ..... | .....  | ..... | .....    | .....  | ..... | .....  | .....    |
| Patr-F*01:01:02 | .....                                                                                            | ..... | .....  | ..... | .....  | ..... | .....    | .....  | ..... | .....  | .....    |
| Patr-F*01:02:01 | .....                                                                                            | ..... | .....  | ..... | .....  | ..... | .....    | .....  | ..... | .....  | .....    |
| Patr-F*01:03    | .....                                                                                            | ..... | .....  | ..... | .....  | ..... | .....    | .....  | ..... | .....  | .....    |
| Papa-F AF084027 | .....                                                                                            | ..... | .....  | ..... | .....  | ..... | .....    | .....  | ..... | .....  | .....    |
| Gogo-F*01:01    | .....                                                                                            | ..... | .....  | ..... | .....  | ..... | .....    | .....  | ..... | .....  | .....    |
| Gogo-F*01:03    | .....                                                                                            | ..... | .....  | ..... | .....  | ..... | .....    | .....  | ..... | .....  | .....    |
| Poab-F*01:01:01 | .....                                                                                            | ..... | T..... | ..... | a..... | ..... | c.....   | c..... | ..... | .....  | .....    |
| Popy-F*01:01:02 | .....                                                                                            | ..... | T..... | ..... | a..... | ..... | c.....   | c..... | ..... | .....  | .....    |
| Mamu-F*02:01    | .....                                                                                            | ..... | T..... | ..... | .....  | ..... | c.....   | c..... | ..... | .....  | .....    |
| Mamu-F*02:02    | .....                                                                                            | ..... | .....  | ..... | .....  | ..... | c.....   | c..... | ..... | .....  | .....    |
| Mafa-F*02:02:01 | .....                                                                                            | ..... | .....  | ..... | .....  | ..... | c.....   | c..... | ..... | .....  | .....    |
| Mafa-F*02:03:01 | .....                                                                                            | ..... | .....  | ..... | .....  | ..... | c.....   | c..... | ..... | .....  | .....    |
| Mane-F*02:01:01 | .....                                                                                            | ..... | .....  | ..... | .....  | ..... | c.....   | c..... | ..... | .....  | .....    |
| Mane-F*02:02:01 | .....                                                                                            | ..... | .....  | ..... | .....  | ..... | c.....   | c..... | ..... | .....  | .....    |
| Paan-F*02:01:01 | .....                                                                                            | ..... | .....  | ..... | .....  | ..... | c.....   | c..... | ..... | .....  | .....    |
| Paan-F*02:02    | .....                                                                                            | ..... | .....  | ..... | .....  | ..... | c.....   | c..... | ..... | .....  | .....    |
| Ceat-F*02:01    | .....                                                                                            | ..... | .....  | ..... | .....  | ..... | c.....   | c..... | ..... | .....  | .....    |
| Ceat-F*02:02    | .....                                                                                            | ..... | .....  | ..... | .....  | ..... | c.....   | c..... | ..... | .....  | .....    |
| Saoe-F*03:02    | .....                                                                                            | ..... | C..... | ..... | A..... | ..... | G.....   | G..... | ..... | A..... | .....    |
| Saoe-F*03:03    | .....                                                                                            | ..... | C..... | ..... | A..... | ..... | G.....   | G..... | ..... | A..... | .....    |
| Saoe-F*03:04    | .....                                                                                            | ..... | C..... | ..... | A..... | ..... | G.....   | G..... | ..... | A..... | .....    |
| Aole-F*05:01    | .....                                                                                            | ..... | C..... | ..... | A..... | ..... | G.....   | G..... | ..... | A..... | .....    |
| Aole-F*05:02    | .....                                                                                            | ..... | C..... | ..... | A..... | ..... | G.....   | G..... | ..... | A..... | .....    |
| Aole-F*05:03    | .....                                                                                            | ..... | C..... | ..... | A..... | ..... | G.....   | G..... | ..... | A..... | .....    |
| Aole-F*05:04    | .....                                                                                            | ..... | C..... | ..... | A..... | ..... | G.....   | G..... | ..... | A..... | .....    |
| Aole-F*05:05    | .....                                                                                            | ..... | C..... | ..... | A..... | ..... | G.....   | G..... | ..... | A..... | .....    |
| Caja-F4*04:01   | .....                                                                                            | ..... | C..... | ..... | A..... | ..... | CA.....  | G..... | ..... | G..... | .....    |
| Caja-F4*04:03   | .....                                                                                            | ..... | C..... | ..... | A..... | ..... | AGA..... | G..... | ..... | G..... | .....    |
| Caja-F4*04:06   | .....                                                                                            | ..... | C..... | ..... | A..... | ..... | AGA..... | G..... | ..... | G..... | .....    |
| Caja-F4*04:07   | .....                                                                                            | ..... | C..... | ..... | A..... | ..... | CA.....  | G..... | ..... | G..... | .....    |
| Caja-F6*06:01   | .....                                                                                            | ..... | C..... | ..... | A..... | ..... | GA.....  | A..... | ..... | G..... | .....    |
| Caja-F6*06:02   | .....                                                                                            | ..... | C..... | ..... | A..... | ..... | GA.....  | A..... | ..... | G..... | .....    |
| Caja-F5*04:02N  | .....                                                                                            | ..... | C..... | ..... | A..... | ..... | AGA..... | G..... | ..... | G..... | .....    |
| Caja-F5*04:04N  | .....                                                                                            | ..... | C..... | ..... | A..... | ..... | AGA..... | G..... | ..... | G..... | .....    |
| Caja-F5*04:05N  | .....                                                                                            | ..... | C..... | ..... | A..... | ..... | AGA..... | G..... | ..... | G..... | .....    |
| Caja-F7*07:01N  | .....                                                                                            | ..... | T..... | ..... | A..... | ..... | G.....   | G..... | ..... | A..... | .....    |
| Caja-F1*08:01N  | .....                                                                                            | ..... | a..... | ..... | C..... | ..... | G.....   | G..... | ..... | A..... | .....    |
| Caja-F1*08:02N  | .....                                                                                            | ..... | a..... | ..... | C..... | ..... | G.....   | G..... | ..... | A..... | .....    |

EXON 4

|                 | 620             | 630    | 640    | 650     | 660         | 670              | 680            | 690           | 700           | 710      | 720    |
|-----------------|-----------------|--------|--------|---------|-------------|------------------|----------------|---------------|---------------|----------|--------|
|                 | -               | ----   | ----   | ----    | ----        | ----             | ----           | ----          | ----          | ----     | ----   |
| HLA-F*01:01     | AAGGCACACGTTGCC | CACC   | CCC    | ATCTCTG | ACCATGAGGCC | ACCCTGAGGTGCTGGG | CCCTGGGCTTCTAC | CCCTGCGGAGATC | ACGCTGACCTGGC | CAGCGGGA |        |
| HLA-F*01:02     | .....           | .....  | .....  | .....   | .....       | .....            | .....          | .....         | .....         | .....    | .....  |
| Patr-F*01:01:02 | .....           | A..... | .....  | .....   | .....       | .....            | .....          | .....         | .....         | .....    | .....  |
| Patr-F*01:02:01 | .....           | .....  | .....  | .....   | .....       | .....            | .....          | .....         | .....         | .....    | .....  |
| Patr-F*01:03    | .....           | .....  | .....  | .....   | .....       | .....            | .....          | .....         | .....         | .....    | .....  |
| Papa-F AF084027 | .....           | .....  | .....  | .....   | .....       | .....            | .....          | .....         | .....         | .....    | .....  |
| Gogo-F*01:01    | .....           | .....  | .....  | .....   | .....       | .....            | .....          | .....         | .....         | .....    | .....  |
| Gogo-F*01:03    | .....           | .....  | .....  | .....   | .....       | .....            | .....          | .....         | .....         | .....    | .....  |
| Poab-F*01:01:01 | .....           | A..... | .....  | .....   | .....       | .....            | .....          | .....         | C.....        | .....    | C..... |
| Popy-F*01:01:02 | .....           | A..... | .....  | .....   | .....       | .....            | .....          | .....         | C.....        | .....    | C..... |
| Mamu-F*02:01    | .....           | .....  | .....  | .....   | G.....      | .....            | .....          | .....         | C.....        | .....    | a..... |
| Mamu-F*02:02    | .....           | .....  | .....  | .....   | G.....      | .....            | .....          | .....         | C.....        | .....    | a..... |
| Mafa-F*02:02:01 | .....           | .....  | .....  | .....   | G.....      | .....            | .....          | .....         | C.....        | .....    | a..... |
| Mafa-F*02:03:01 | .....           | .....  | .....  | .....   | G.....      | .....            | .....          | .....         | C.....        | .....    | a..... |
| Mane-F*02:01:01 | .....           | .....  | A..... | .....   | G.....      | .....            | .....          | .....         | C.....        | .....    | a..... |
| Mane-F*02:02:01 | .....           | .....  | A..... | .....   | G.....      | .....            | .....          | .....         | C.....        | .....    | a..... |
| Paan-F*02:01:01 | .....           | .....  | .....  | .....   | G.....      | .....            | .....          | .....         | C.....        | .....    | a..... |
| Paan-F*02:02    | .....           | .....  | .....  | .....   | G.....      | .....            | .....          | .....         | C.....        | .....    | a..... |
| Ceat-F*02:01    | .....           | .....  | .....  | .....   | G.....      | .....            | .....          | .....         | C.....        | .....    | a..... |
| Ceat-F*02:02    | .....           | .....  | .....  | .....   | G.....      | .....            | .....          | .....         | C.....        | .....    | a..... |
| Saoe-F*03:02    | .....           | .....  | .....  | .....   | T.....      | .....            | .....          | .....         | .....         | t.T..... | a..... |
| Saoe-F*03:03    | .....           | .....  | .....  | .....   | T.....      | .....            | .....          | .....         | .....         | t.T..... | a..... |
| Saoe-F*03:04    | .....           | .....  | .....  | .....   | T.....      | .....            | .....          | .....         | .....         | t.T..... | a..... |
| Aole-F*05:01    | ..a.....        | .....  | .....  | .....   | .....       | .....            | .....          | G.....        | .....         | a.....   | .....  |
| Aole-F*05:02    | ..a.....        | .....  | .....  | .....   | .....       | .....            | .....          | .....         | .....         | a.....   | .....  |
| Aole-F*05:03    | ..a.....        | .....  | T..... | .....   | .....       | .....            | .....          | G.....        | .....         | a.....   | .....  |
| Aole-F*05:04    | ..a.....        | .....  | T..... | .....   | .....       | .....            | .....          | G.....        | .....         | a.....   | .....  |
| Aole-F*05:05    | ..a.....        | .....  | .....  | .....   | .....       | .....            | .....          | G.....        | .....         | a.....   | .....  |
| Caja-F4*04:01   | .....           | t..... | .....  | .....   | .....       | .....            | t.....         | .....         | T.....        | T.....   | a..... |
| Caja-F4*04:03   | .....           | t..... | .....  | .....   | a.....      | .....            | t.....         | .....         | T.....        | T.....   | a..... |
| Caja-F4*04:06   | .....           | t..... | .....  | .....   | a.....      | .....            | t.....         | .....         | T.....        | T.....   | a..... |
| Caja-F4*04:07   | .....           | t..... | .....  | .....   | .....       | .....            | t.....         | .....         | T.....        | T.....   | a..... |
| Caja-F6*06:01   | .....           | t..... | .....  | .....   | .....       | a.....           | t.....         | .....         | T.....        | T.....   | a..... |
| Caja-F6*06:02   | .....           | t..... | .....  | .....   | .....       | a.....           | t.....         | .....         | T.....        | T.....   | a..... |
| Caja-F5*04:02N  | .....           | t..... | .....  | .....   | .....       | .....            | t.....         | .....         | T.....        | T.....   | a..... |
| Caja-F5*04:04N  | .....           | t..... | .....  | .....   | .....       | .....            | t.....         | .....         | T.....        | T.....   | a..... |
| Caja-F5*04:05N  | .....           | t..... | .....  | .....   | .....       | .....            | t.....         | .....         | T.....        | T.....   | a..... |
| Caja-F7*07:01N  | .....           | t..... | .....  | .....   | T.....      | a.....           | t.....         | .....         | T.....        | T.....   | a..... |
| Caja-F1*08:01N  | .....           | t..... | .....  | .....   | .....       | .....            | t.....         | .....         | T.....        | T.....   | a..... |
| Caja-F1*08:02N  | .....           | t..... | .....  | .....   | .....       | .....            | t.....         | .....         | T.....        | T.....   | a..... |

EXON 4

|                 | 730                                                                                                      | 740         | 750   | 760   | 770    | 780    | 790   | 800          | 810               | 820      |
|-----------------|----------------------------------------------------------------------------------------------------------|-------------|-------|-------|--------|--------|-------|--------------|-------------------|----------|
| HLA-F*01:01     | TGGGGAGGAACAGACCCAGGACACAGAGCTTGTGGAGACCAGGCCTGCAGGGGATGGAACCTTCCAGAAGTGGGCCGCTGTGGTGGTGCCTTCTGGAGAGGAAC |             |       |       |        |        |       |              |                   |          |
| HLA-F*01:02     | .....                                                                                                    | .....       | ..... | ..... | .....  | .....  | ..... | .....        | .....             | .....    |
| Patr-F*01:01:02 | .....                                                                                                    | .....       | ..... | ..... | .....  | A..... | ..... | t.....       | .....             | .....    |
| Patr-F*01:02:01 | c.....                                                                                                   | .....       | ..... | ..... | .....  | .....  | ..... | .....        | .....             | .....    |
| Patr-F*01:03    | c.....                                                                                                   | .....       | ..... | ..... | .....  | .....  | ..... | t.....       | .....             | .....    |
| Papa-F AF084027 | c.....                                                                                                   | .....       | ..... | ..... | .....  | A..... | ..... | .....        | .....             | .....    |
| Gogo-F*01:01    | .....                                                                                                    | .....       | ..... | ..... | .....  | .....  | ..... | .....        | .....             | .....    |
| Gogo-F*01:03    | .....                                                                                                    | .....       | ..... | ..... | .....  | A..... | ..... | .....        | .....             | .....    |
| Poab-F*01:01:01 | .....                                                                                                    | .....       | ..... | ..... | A..... | .....  | ..... | .....        | .....             | .....    |
| Popy-F*01:01:02 | .....                                                                                                    | .....       | ..... | ..... | A..... | .....  | ..... | .....        | .....             | .....    |
| Mamu-F*02:01    | c.....                                                                                                   | g.....      | ..... | ..... | .....  | .....  | ..... | a.....       | .....             | c.....g. |
| Mamu-F*02:02    | c.....                                                                                                   | g.....      | ..... | ..... | .....  | .....  | ..... | a.....       | .....             | c.....g. |
| Mafa-F*02:02:01 | c.....                                                                                                   | g.....      | ..... | ..... | .....  | .....  | ..... | a.....       | .....             | c.....g. |
| Mafa-F*02:03:01 | c.....                                                                                                   | g.....      | ..... | ..... | .....  | .....  | ..... | a.....       | .....             | c.....g. |
| Mane-F*02:01:01 | c.....                                                                                                   | g.....      | ..... | ..... | .....  | .....  | ..... | a.....       | .....             | c.....g. |
| Mane-F*02:02:01 | c.....                                                                                                   | g.....      | ..... | ..... | .....  | .....  | ..... | a.....       | .....             | c.....g. |
| Paan-F*02:01:01 | c.....                                                                                                   | g.....      | ..... | ..... | .....  | .....  | ..... | a.....       | .....             | c.....g. |
| Paan-F*02:02    | c.....                                                                                                   | g.....      | ..... | ..... | .....  | .....  | ..... | a.....       | .....             | c.....g. |
| Ceat-F*02:01    | c.....                                                                                                   | g.....      | ..... | ..... | .....  | .....  | ..... | a.....       | .....             | c.....g. |
| Ceat-F*02:02    | .....                                                                                                    | g.....      | ..... | ..... | .....  | .....  | ..... | a.....       | .....             | c.....g. |
| Saoe-F*03:02    | ...a...T.....                                                                                            | .....a..... | ..... | ..... | .....  | A..... | ..... | a.....       | .....T.....       | g.....g. |
| Saoe-F*03:03    | ...a...T.....                                                                                            | .....a..... | ..... | ..... | .....  | .....  | ..... | a.....       | .....T.....       | g.....g. |
| Saoe-F*03:04    | ...a...T.....                                                                                            | .....a..... | ..... | ..... | .....  | A..... | ..... | a.....       | .....T.....       | g.....g. |
| Aole-F*05:01    | .....C.....                                                                                              | TG.a.....   | ..... | ..... | .....  | .....  | ..... | g.....       | .....T.....       | g.....g. |
| Aole-F*05:02    | .....C.....                                                                                              | TG.a.....   | ..... | ..... | .....  | .....  | ..... | a.....       | .....T.....       | g.....g. |
| Aole-F*05:03    | .....C.....                                                                                              | TG.a.....   | ..... | ..... | .....  | .....  | ..... | g.....       | .....T.....       | g.....g. |
| Aole-F*05:04    | .....C.....                                                                                              | TG.a.....   | ..... | ..... | .....  | .....  | ..... | g.....       | .....T.....       | g.....g. |
| Aole-F*05:05    | .....C.....                                                                                              | TG.a.....   | ..... | ..... | .....  | .....  | ..... | g.....       | .....T.....       | g.....g. |
| Caja-F4*04:01   | ...a...T.....                                                                                            | .....       | ..... | ..... | .....  | .....  | ..... | a.....       | .....T.....       | g.....gG |
| Caja-F4*04:03   | ...a...T.....                                                                                            | .....       | ..... | ..... | .....  | .....  | ..... | a.....       | .....T.....       | g.....gG |
| Caja-F4*04:06   | ...a...T.....                                                                                            | .....       | ..... | ..... | .....  | .....  | ..... | a.....       | .....T.....       | g.....gG |
| Caja-F4*04:07   | ...a...T.....                                                                                            | .....       | ..... | ..... | .....  | .....  | ..... | a.....       | .....T.....       | g.....gG |
| Caja-F6*06:01   | ...a...T.....                                                                                            | .....       | ..... | ..... | .....  | .....  | ..... | a.....       | .....T.....       | g.....g. |
| Caja-F6*06:02   | ...a...T.....                                                                                            | .....       | ..... | ..... | .....  | .....  | ..... | a.....       | .....T.....       | g.....g. |
| Caja-F5*04:02N  | ...a...T.....                                                                                            | .....       | ..... | ..... | .....  | .....  | ..... | a.....a..... | .....T.....       | g.....gG |
| Caja-F5*04:04N  | ...a...T.....                                                                                            | .....       | ..... | ..... | .....  | .....  | ..... | a.....       | .....T.....       | g.....gG |
| Caja-F5*04:05N  | ...a...T.....                                                                                            | .....       | ..... | ..... | .....  | .....  | ..... | a.....a..... | .....T.....       | g.....gG |
| Caja-F7*07:01N  | ...a...T.....                                                                                            | .....       | ..... | ..... | .....  | .....  | ..... | a.....       | .....T.....T..... | g.....g. |
| Caja-F1*08:01N  | ...a...T.....                                                                                            | .....       | ..... | ..... | .....  | A..... | ..... | a.....       | .....T.....       | g.....g. |
| Caja-F1*08:02N  | ...a...T.....                                                                                            | .....       | ..... | ..... | .....  | A..... | ..... | a.....       | .....T.....       | g.....g. |



EXON 4

EXON 5

|                 | 830        | 840       | 850     | 860       | 870     | 880      | 890      | 900       | 910       | 920    | 930     |        |          |            |
|-----------------|------------|-----------|---------|-----------|---------|----------|----------|-----------|-----------|--------|---------|--------|----------|------------|
| HLA-F*01:01     | AGAGATAC   | ACATGCCAT | GTGCAGC | CACGAGGGG | CTGCCCC | CAGCCCCT | CATCCTG  | GAGATGGG  | AGCAGTCT  | CCCCAG | CCCACC  | ATCCCC | ATCGTGGG | CATCGTTGCT |
| HLA-F*01:02     | .....      | .....     | .....   | .....     | .....   | .....    | .....    | .....     | .....     | .....  | .....   | .....  | .....    | .....      |
| Patr-F*01:01:02 | .....      | g.....    | .....   | .....     | .....   | C.....   | .....    | .....     | .....     | .....  | .....   | .....  | .....    | .....      |
| Patr-F*01:02:01 | .....      | g.....    | .....   | .....     | .....   | C.....   | .....    | .....     | .....     | .....  | .....   | .....  | .....    | .....      |
| Patr-F*01:03    | .....      | TG.....   | .....   | .....     | .....   | C.....   | .....    | .....     | .....     | .....  | .....   | .....  | .....    | .....      |
| Papa-F AF084027 | .....      | g.....    | .....   | .....     | .....   | C.....   | .....    | .....     | .....     | .....  | .....   | .....  | .....    | .....      |
| Gogo-F*01:01    | .....      | g.....    | .....   | .....     | .....   | C.....   | .....    | .....     | .....     | .....  | .....   | .....  | .....    | .....      |
| Gogo-F*01:03    | .....      | g.....    | .....   | .....     | .....   | C.....   | .....    | .....     | .....     | .....  | .....   | .....  | .....    | .....      |
| Poab-F*01:01:01 | .....      | c.....    | .....   | A.....    | .....   | G.....   | .....    | C.....    | .....     | .....  | .....   | .....  | .....    | .....      |
| Popy-F*01:01:02 | .....      | c.....    | .....   | A.....    | .....   | G.....   | .....    | C.....    | .....     | .....  | .....   | .....  | .....    | .....      |
| Mamu-F*02:01    | .....      | g.....    | a.....  | a.....    | .....   | C.....   | .....    | TC.....   | T.....    | T..... | .....   | t..... | .....    | .....      |
| Mamu-F*02:02    | .....      | g.....    | a.....  | a.....    | T.....  | C.....   | .....    | TC.....   | T.....    | T..... | .....   | t..... | .....    | .....      |
| Mafa-F*02:02:01 | .....      | g.....    | a.....  | a.....    | .....   | C.....   | .....    | TC.....   | T.....    | T..... | .....   | t..... | .....    | .....      |
| Mafa-F*02:03:01 | .....      | g.....    | a.....  | a.....    | .....   | C.....   | .....    | TC.....   | T.....    | T..... | .....   | t..... | .....    | .....      |
| Mane-F*02:01:01 | .....      | g.....    | a.....  | a.....    | .....   | C.....   | .....    | TC.....   | T.....    | T..... | .....   | t..... | .....    | .....      |
| Mane-F*02:02:01 | .....      | g.....    | a.....  | a.....    | .....   | C.....   | .....    | TC.....   | T.....    | T..... | .....   | t..... | .....    | .....      |
| Paan-F*02:01:01 | .....      | c.....    | T.....  | a.....    | a.....  | C.....   | .....    | C.....    | T.....    | T..... | .....   | t..... | t.....   | .....      |
| Paan-F*02:02    | .....      | c.....    | T.....  | a.....    | a.....  | C.....   | .....    | C.....    | T.....    | T..... | .....   | t..... | t.....   | .....      |
| Ceat-F*02:01    | .....      | c.....    | T.....  | a.....    | a.....  | C.....   | .....    | C.....    | T.....    | T..... | .....   | t..... | t.....   | .....      |
| Ceat-F*02:02    | .....      | c.....    | T.....  | a.....    | a.....  | C.....   | .....    | C.....    | T.....    | T..... | .....   | t..... | t.....   | .....      |
| Saoe-F*03:02    | ..c.....   | c.....    | .....   | .....     | aG..... | T.....   | C.....   | ..CA..... | T.....    | .....  | G.....  | T..... | A.....   | ..AC.....  |
| Saoe-F*03:03    | ..c.....   | c.....    | .....   | .....     | aG..... | T.....   | C.....   | ..CA..... | T.....    | .....  | G.....  | T..... | A.....   | ..AC.....  |
| Saoe-F*03:04    | ..c.....   | c.....    | .....   | .....     | aG..... | T.....   | C.....   | ..CA..... | T.....    | .....  | G.....  | T..... | A.....   | ..AC.....  |
| Aole-F*05:01    | ..c.g..... | c.....    | .....   | .....     | aG..... | A.....   | C.....   | ..CA..... | T.....    | .....  | tG..... | .....  | .....    | ..GA.....  |
| Aole-F*05:02    | ..c.g..... | c.....    | .....   | .....     | aG..... | A.....   | C.....   | ..CA..... | T.....    | .....  | tG..... | .....  | .....    | ..GA.....  |
| Aole-F*05:03    | ..c.g..... | c.....    | .....   | .....     | aG..... | A.....   | C.....   | ..CA..... | T.....    | .....  | tG..... | .....  | .....    | ..GA.....  |
| Aole-F*05:04    | ..c.g..... | c.....    | .....   | .....     | aG..... | A.....   | C.....   | ..CA..... | T.....    | .....  | tG..... | .....  | .....    | ..GA.....  |
| Aole-F*05:05    | ..c.g..... | c.....    | .....   | .....     | aG..... | A.....   | C.....   | ..CA..... | T.....    | .....  | tG..... | .....  | .....    | ..GA.....  |
| Caja-F4*04:01   | ..c.....   | c.....    | .....   | .....     | aG..... | .....    | C.....   | ..CA..... | T.....    | .....  | .....   | T..... | .....    | .....      |
| Caja-F4*04:03   | ..c.....   | c.....    | .....   | .....     | aG..... | .....    | C.....   | ..CA..... | T.....    | .....  | .....   | T..... | .....    | .....      |
| Caja-F4*04:06   | ..c.....   | c.....    | .....   | .....     | aG..... | .....    | C.....   | ..CA..... | T.....    | .....  | .....   | T..... | .....    | .....      |
| Caja-F4*04:07   | ..c.....   | c.....    | .....   | .....     | aG..... | .....    | C.....   | ..CA..... | T.....    | .....  | .....   | T..... | .....    | .....      |
| Caja-F6*06:01   | ..c.....   | c.....    | .....   | G.....    | aG..... | .....    | t.C..... | A.....    | ..CA..... | T..... | .....   | G..... | T.....   | .....      |
| Caja-F6*06:02   | ..c.....   | c.....    | .....   | G.....    | aG..... | .....    | t.C..... | A.....    | ..CA..... | T..... | .....   | G..... | T.....   | .....      |
| Caja-F5*04:02N  | ..c.....   | c.....    | .....   | A.....    | aG..... | .....    | C.....   | C.....    | ..CA..... | T..... | .....   | T..... | .....    | .....      |
| Caja-F5*04:04N  | ..c.....   | c.....    | .....   | .....     | aG..... | .....    | C.....   | .....     | ..CA..... | T..... | .....   | T..... | .....    | .....      |
| Caja-F5*04:05N  | ..c.....   | c.....    | .....   | A.....    | aG..... | .....    | C.....   | C.....    | ..CA..... | T..... | .....   | T..... | .....    | .....      |
| Caja-F7*07:01N  | ..c.....   | c.....    | .....   | A.....    | aG..... | .....    | C.....   | A.....    | ..CA..... | T..... | .....   | T..... | .....    | .....      |
| Caja-F1*08:01N  | ..c.....   | c.....    | .....   | .....     | aG..... | .....    | C.....   | .....     | ..CA..... | T..... | .....   | G..... | .....    | A.A.....   |
| Caja-F1*08:02N  | ..c.....   | c.....    | .....   | .....     | aG..... | .....    | C.....   | .....     | ..CA..... | T..... | .....   | G..... | .....    | A.A.....   |



EXON 6      EXON 8

|                 | 1030         |  | 1040    |
|-----------------|--------------|--|---------|
|                 | ---- -----:- |  | --- --- |
| HLA-F*01:01     | TCAGGCTGCAG  |  | TGTGA   |
| HLA-F*01:02     | .....        |  | .....   |
| Patr-F*01:01:02 | .....        |  | .....   |
| Patr-F*01:02:01 | .....        |  | .....   |
| Patr-F*01:03    | .....        |  | .....   |
| Papa-F AF084027 | .....        |  | .....   |
| Gogo-F*01:01    | .....        |  | .....   |
| Gogo-F*01:03    | .....        |  | .....   |
| Poab-F*01:01:01 | .....A       |  | .....   |
| Popy-F*01:01:02 | .....A       |  | .....   |
| Mamu-F*02:01    | ....C..A..A  |  | .....   |
| Mamu-F*02:02    | ....C..A..A  |  | .....   |
| Mafa-F*02:02:01 | ....C..A..A  |  | .....   |
| Mafa-F*02:03:01 | ....C..A..A  |  | .....   |
| Mane-F*02:01:01 | ....C..A..A  |  | .....   |
| Mane-F*02:02:01 | ....C..A..A  |  | .....   |
| Paan-F*02:01:01 | ....C..A..A  |  | .....   |
| Paan-F*02:02    | ....C..A..A  |  | .....   |
| Ceat-F*02:01    | ....C.....A  |  | .....   |
| Ceat-F*02:02    | ....C.....A  |  | .....   |
| Saoe-F*03:02    | .....A       |  | .....   |
| Saoe-F*03:03    | .....A       |  | .....   |
| Saoe-F*03:04    | .....A       |  | .....   |
| Aole-F*05:01    | .....A       |  | .....   |
| Aole-F*05:02    | .....A       |  | .....   |
| Aole-F*05:03    | .....A       |  | .....   |
| Aole-F*05:04    | .....A       |  | .....   |
| Aole-F*05:05    | .....A       |  | .....   |
| Caja-F4*04:01   | .....A       |  | .....   |
| Caja-F4*04:03   | .....A       |  | .....   |
| Caja-F4*04:06   | .....A       |  | .....   |
| Caja-F4*04:07   | .....A       |  | .....   |
| Caja-F6*06:01   | .....A       |  | .....   |
| Caja-F6*06:02   | .....A       |  | .....   |
| Caja-F5*04:02N  | .....A       |  | .....T  |
| Caja-F5*04:04N  | .....A       |  | .....   |
| Caja-F5*04:05N  | .....A       |  | .....T  |
| Caja-F7*07:01N  | .....A       |  | .....   |
| Caja-F1*08:01N  | .....A       |  | .....   |
| Caja-F1*08:02N  | .....A       |  | .....   |
