# Supplementary material for: Evolution of HLA-F and its orthologues in primate species: a complex tale of conservation, diversification and inactivation
Source: PubMed Central journal article supplement (PMC7725694; doi:10.1007/s00251-020-01187-1), 2020-11-12
Supplement: 251_2020_1187_MOESM3_ESM.pdf [file 251_2020_1187_MOESM3_ESM.pdf]

EXON 1

EXON 2

|                 | 10                                                              | 20 | 30 | 40 | 50 | 60 | 70                                             | 80 | 90 | 100 | 110 |
|-----------------|-----------------------------------------------------------------|----|----|----|----|----|------------------------------------------------|----|----|-----|-----|
| Consensus       | ATGGCGCCCCGAACCTCTCTCCTGGTCTCTCAGGGGCCCTGGCCCTGACCGAGACCTGGGCGG |    |    |    |    |    | GCTCCCACTCCTTGCCGTATTTTAGCACCGCTGTGTCGCGGCCCGG |    |    |     |     |
| Mafa-F*02:02:01 | .....                                                           |    |    |    |    |    |                                                |    |    |     |     |
| Mafa-F*02:03:01 | .....                                                           |    |    |    |    |    |                                                |    |    |     |     |
| Mafa-F*02:04:01 | . . . . . a . . . . .                                           |    |    |    |    |    | . . . . . a . . . . .                          |    |    |     |     |
| Mafa-F*02:06:01 | .....                                                           |    |    |    |    |    |                                                |    |    |     |     |
| Mafa-F*02:07    | . . . . . a . . . . .                                           |    |    |    |    |    |                                                |    |    |     |     |
| Mafa-F*02:08    | .....                                                           |    |    |    |    |    |                                                |    |    |     |     |
| Mafa-F*02:09:01 | .....                                                           |    |    |    |    |    |                                                |    |    |     |     |
| Mafa-F*02:10    | .....                                                           |    |    |    |    |    |                                                |    |    |     |     |
| Mafa-F*02:11    | . . . . . a . . . . .                                           |    |    |    |    |    | .....                                          |    |    |     |     |
| Mafa-F*02:12    | .....                                                           |    |    |    |    |    |                                                |    |    |     |     |
| Mafa-F*021:3    | .....                                                           |    |    |    |    |    |                                                |    |    |     |     |
| Mafa-F*02:14    | .....                                                           |    |    |    |    |    |                                                |    |    |     |     |
| Mafa-F*02:15    | .....                                                           |    |    |    |    |    |                                                |    |    |     |     |
| Mafa-F*02:16    | .....                                                           |    |    |    |    |    |                                                |    |    |     |     |
| Mafa-F*02:17    | . . . . . a . . . . .                                           |    |    |    |    |    | .....                                          |    |    |     |     |
| Mafa-F*02:18    | . . . . . a . . . . .                                           |    |    |    |    |    | .....                                          |    |    |     |     |
| Mafa-F*02:19    | .....                                                           |    |    |    |    |    |                                                |    |    |     |     |
| Mafa-F*02:20    | .....                                                           |    |    |    |    |    |                                                |    |    |     |     |
| Mafa-F*02:21    | .....                                                           |    |    |    |    |    |                                                |    |    |     |     |
| Mafa-F*02:22    | .....                                                           |    |    |    |    |    |                                                |    |    |     |     |
| Mamu-F*02:01    | .....                                                           |    |    |    |    |    |                                                |    |    |     |     |
| Mamu-F*02:02    | .....                                                           |    |    |    |    |    |                                                |    |    |     |     |
| Mamu-F*02:03:01 | .....                                                           |    |    |    |    |    |                                                |    |    |     |     |
| Mamu-F*02:04:01 | .....                                                           |    |    |    |    |    |                                                |    |    |     |     |
| Mamu-F*02:07:01 | .....                                                           |    |    |    |    |    |                                                |    |    |     |     |
| Mamu-F*02:08:01 | . . . . . a . . . . .                                           |    |    |    |    |    | . . . . . t . . . . .                          |    |    |     |     |
| Mamu-F*02:09    | .....                                                           |    |    |    |    |    |                                                |    |    |     |     |
| Mamu-F*02:10    | .....                                                           |    |    |    |    |    |                                                |    |    |     |     |
| Mamu-F*02:11    | .....                                                           |    |    |    |    |    |                                                |    |    |     |     |
| Mamu-F*02:12    | .....                                                           |    |    |    |    |    |                                                |    |    |     |     |
| Mamu-F*02:13    | .....                                                           |    |    |    |    |    |                                                |    |    |     |     |
| Mamu-F*02:14    | .....                                                           |    |    |    |    |    |                                                |    |    |     |     |
| Mamu-F*02:15    | .....                                                           |    |    |    |    |    |                                                |    |    |     |     |
| Mamu-F*02:16    | .....                                                           |    |    |    |    |    |                                                |    |    |     |     |
| Mamu-F*02:17    | . . . . . a . . . . .                                           |    |    |    |    |    | .....                                          |    |    |     |     |
| Mamu-F*02:18    | .....                                                           |    |    |    |    |    |                                                |    |    |     |     |



EXON 2

230 240 250 260 270 280 290 300 310 320 330  
-----|-----|-----|-----|-----|-----|-----|-----|-----|-----|-----|  
Consensus GGGTGGAGCAAGAGGGGCCGCAGTATTGGGAGCGGACCACAGGGTACGCCAAGGCCAACGCACGGACTGACCGAGTGGCCCTGAGGAAGCTGCTCCTCCGCTACACCAG  
Mafa-F\*02:02:01 .....  
Mafa-F\*02:03:01 .....  
Mafa-F\*02:04:01 .....  
Mafa-F\*02:06:01 .....  
Mafa-F\*02:07 .....  
Mafa-F\*02:08 .....  
Mafa-F\*02:09:01 .....  
Mafa-F\*02:10 .....  
Mafa-F\*02:11 .....  
Mafa-F\*02:12 .....  
Mafa-F\*021:3 .....  
Mafa-F\*02:14 .....  
Mafa-F\*02:15 .....  
Mafa-F\*02:16 .....  
Mafa-F\*02:17 .....  
Mafa-F\*02:18 .....  
Mafa-F\*02:19 .....  
Mafa-F\*02:20 .....  
Mafa-F\*02:21 ..... C .....  
Mafa-F\*02:22 .....  
Mamu-F\*02:01 .....  
Mamu-F\*02:02 .....  
Mamu-F\*02:03:01 .....  
Mamu-F\*02:04:01 .....  
Mamu-F\*02:07:01 .....  
Mamu-F\*02:08:01 .....  
Mamu-F\*02:09 .....  
Mamu-F\*02:10 .....  
Mamu-F\*02:11 .....  
Mamu-F\*02:12 .....  
Mamu-F\*02:13 .....  
Mamu-F\*02:14 .....  
Mamu-F\*02:15 .....  
Mamu-F\*02:16 .....  
Mamu-F\*02:17 .....  
Mamu-F\*02:18 .....



EXON 3

```

          450      460      470      480      490      500      510      520      530      540      550
-----|-----|-----|-----|-----|-----|-----|-----|-----|-----|-----|
Consensus  CTCCCTGAACGAGGACCTGCGCTCCTGGACCGCCGCGGACACGGTAGCTCGGATCACCCAGCGCTTCTATGAGGCAGAGGAATATGCAGAGGAGTTCAGGACCTACCTGG
Mafa-F*02:02:01 .....
Mafa-F*02:03:01 .....
Mafa-F*02:04:01 .....
Mafa-F*02:06:01 .....
Mafa-F*02:07 .....
Mafa-F*02:08 .....
Mafa-F*02:09:01 .....
Mafa-F*02:10 .....
Mafa-F*02:11 .....
Mafa-F*02:12 .....
Mafa-F*021:3 .....
Mafa-F*02:14 .....
Mafa-F*02:15 .....
Mafa-F*02:16 .....
Mafa-F*02:17 .....
Mafa-F*02:18 .....
Mafa-F*02:19 .....
Mafa-F*02:20 .....
Mafa-F*02:21 .....
Mafa-F*02:22 .....
Mamu-F*02:01 .....T.....
Mamu-F*02:02 .....
Mamu-F*02:03:01 .....
Mamu-F*02:04:01 .....
Mamu-F*02:07:01 .....
Mamu-F*02:08:01 .....
Mamu-F*02:09 .....
Mamu-F*02:10 .....
Mamu-F*02:11 .....
Mamu-F*02:12 .....
Mamu-F*02:13 .....
Mamu-F*02:14 .....
Mamu-F*02:15 .....
Mamu-F*02:16 .....
Mamu-F*02:17 .....
Mamu-F*02:18 .....
```



EXON 4

|                 | 670                                                                                                            | 680 | 690 | 700 | 710 | 720 | 730 | 740 | 750 | 760 | 770 |
|-----------------|----------------------------------------------------------------------------------------------------------------|-----|-----|-----|-----|-----|-----|-----|-----|-----|-----|
| Consensus       | GAGGCCACCCTGAGGTGCTGGGCCCTGGGCTTCTACCCTGCCGAGATCACACTGACCTGGCAGCGGGACGGGGAGGAACAGACCCAGGACACGGAGCTTGTGGAGACCAG |     |     |     |     |     |     |     |     |     |     |
| Mafa-F*02:02:01 | .....                                                                                                          |     |     |     |     |     |     |     |     |     |     |
| Mafa-F*02:03:01 | .....                                                                                                          |     |     |     |     |     |     |     |     |     |     |
| Mafa-F*02:04:01 | .....                                                                                                          |     |     |     |     |     |     |     |     |     |     |
| Mafa-F*02:06:01 | .....                                                                                                          |     |     |     |     |     |     |     |     |     |     |
| Mafa-F*02:07    | .....                                                                                                          |     |     |     |     |     |     |     |     |     |     |
| Mafa-F*02:08    | .....                                                                                                          |     |     |     |     |     |     |     |     |     |     |
| Mafa-F*02:09:01 | .....t.....                                                                                                    |     |     |     |     |     |     |     |     |     |     |
| Mafa-F*02:10    | .....                                                                                                          |     |     |     |     |     |     |     |     |     |     |
| Mafa-F*02:11    | .....                                                                                                          |     |     |     |     |     |     |     |     |     |     |
| Mafa-F*02:12    | .....                                                                                                          |     |     |     |     |     |     |     |     |     |     |
| Mafa-F*02:13    | .....A.....                                                                                                    |     |     |     |     |     |     |     |     |     |     |
| Mafa-F*02:14    | .....A.....                                                                                                    |     |     |     |     |     |     |     |     |     |     |
| Mafa-F*02:15    | .....A.....                                                                                                    |     |     |     |     |     |     |     |     |     |     |
| Mafa-F*02:16    | .....                                                                                                          |     |     |     |     |     |     |     |     |     |     |
| Mafa-F*02:17    | .....                                                                                                          |     |     |     |     |     |     |     |     |     |     |
| Mafa-F*02:18    | .....                                                                                                          |     |     |     |     |     |     |     |     |     |     |
| Mafa-F*02:19    | .....                                                                                                          |     |     |     |     |     |     |     |     |     |     |
| Mafa-F*02:20    | .....                                                                                                          |     |     |     |     |     |     |     |     |     |     |
| Mafa-F*02:21    | .....                                                                                                          |     |     |     |     |     |     |     |     |     |     |
| Mafa-F*02:22    | .....T.....                                                                                                    |     |     |     |     |     |     |     |     |     |     |
| Mamu-F*02:01    | .....                                                                                                          |     |     |     |     |     |     |     |     |     |     |
| Mamu-F*02:02    | .....                                                                                                          |     |     |     |     |     |     |     |     |     |     |
| Mamu-F*02:03:01 | .....                                                                                                          |     |     |     |     |     |     |     |     |     |     |
| Mamu-F*02:04:01 | .....                                                                                                          |     |     |     |     |     |     |     |     |     |     |
| Mamu-F*02:07:01 | .....                                                                                                          |     |     |     |     |     |     |     |     |     |     |
| Mamu-F*02:08:01 | .....t.....                                                                                                    |     |     |     |     |     |     |     |     |     |     |
| Mamu-F*02:09    | .....t.....                                                                                                    |     |     |     |     |     |     |     |     |     |     |
| Mamu-F*02:10    | .....t.....C.g.....                                                                                            |     |     |     |     |     |     |     |     |     |     |
| Mamu-F*02:11    | .....C.....                                                                                                    |     |     |     |     |     |     |     |     |     |     |
| Mamu-F*02:12    | .....                                                                                                          |     |     |     |     |     |     |     |     |     |     |
| Mamu-F*02:13    | .....                                                                                                          |     |     |     |     |     |     |     |     |     |     |
| Mamu-F*02:14    | .....t.....                                                                                                    |     |     |     |     |     |     |     |     |     |     |
| Mamu-F*02:15    | .....                                                                                                          |     |     |     |     |     |     |     |     |     |     |
| Mamu-F*02:16    | .....g.....                                                                                                    |     |     |     |     |     |     |     |     |     |     |
| Mamu-F*02:17    | .....                                                                                                          |     |     |     |     |     |     |     |     |     |     |
| Mamu-F*02:18    | .....                                                                                                          |     |     |     |     |     |     |     |     |     |     |

EXON 4

```

              780       790       800       810       820       830       840       850       860       870       880
-----|-----|-----|-----|-----|-----|-----|-----|-----|-----|-----|-----|
Consensus    GCCTGCAGGGGATGGAACCTTCCAGAAGTGGGCAGCTGTGGTGGTGCCTTCCGGAGAGGAGCAGAGATACACGTGCCATGTGCAACACGAAGGGCTGCCCCAGCCCCTCA
Mafa-F*02:02:01 .....
Mafa-F*02:03:01 .....
Mafa-F*02:04:01 .....t.....
Mafa-F*02:06:01 .....
Mafa-F*02:07 .....
Mafa-F*02:08 .....
Mafa-F*02:09:01 .....
Mafa-F*02:10 .....
Mafa-F*02:11 .....g.....
Mafa-F*02:12 .....
Mafa-F*021:3 .....
Mafa-F*02:14 .....
Mafa-F*02:15 .....
Mafa-F*02:16 .....
Mafa-F*02:17 .....g.....T.....
Mafa-F*02:18 .....T.....
Mafa-F*02:19 .....
Mafa-F*02:20 .....T.....
Mafa-F*02:21 .....
Mafa-F*02:22 .....
Mamu-F*02:01 .....
Mamu-F*02:02 .....T.....
Mamu-F*02:03:01 .....
Mamu-F*02:04:01 .....
Mamu-F*02:07:01 .....
Mamu-F*02:08:01 .....
Mamu-F*02:09 .....
Mamu-F*02:10 .....
Mamu-F*02:11 .....
Mamu-F*02:12 .....
Mamu-F*02:13 .....
Mamu-F*02:14 .....
Mamu-F*02:15 .....C.....g.....
Mamu-F*02:16 .....
Mamu-F*02:17 .....
Mamu-F*02:18 .....T.....
```



EXON 5

|                 | 890          | 900                                                                                                 | 910   | 920   | 930   | 940    | 950   | 960    | 970   | 980    | 990   |
|-----------------|--------------|-----------------------------------------------------------------------------------------------------|-------|-------|-------|--------|-------|--------|-------|--------|-------|
| Consensus       | CCCTGAGATGGG | AGTCGTCTTCTCAGCCCACCATCCCCATTGTGGGCATCGTTGCTGGCCTGGCTGTCCTAGCAGTTGTGGTTACTGGAGCTGTGGTCCGCTGCTGTAATG |       |       |       |        |       |        |       |        |       |
| Mafa-F*02:02:01 | .....        | .....                                                                                               | ..... | ..... | ..... | .....  | ..... | .....  | ..... | .....  | ..... |
| Mafa-F*02:03:01 | .....        | .....                                                                                               | ..... | ..... | ..... | .....  | ..... | .....  | ..... | A..... | ..... |
| Mafa-F*02:04:01 | .....        | .....                                                                                               | ..... | ..... | ..... | .....  | ..... | C..... | ..... | .....  | ..... |
| Mafa-F*02:06:01 | .....        | .....                                                                                               | ..... | ..... | ..... | .....  | ..... | C..... | ..... | .....  | ..... |
| Mafa-F*02:07    | .....        | .....                                                                                               | ..... | ..... | ..... | .....  | ..... | C..... | ..... | .....  | ..... |
| Mafa-F*02:08    | .....        | .....                                                                                               | ..... | ..... | ..... | .....  | ..... | .....  | ..... | .....  | ..... |
| Mafa-F*02:09:01 | .....        | .....                                                                                               | ..... | ..... | ..... | .....  | ..... | C..... | ..... | .....  | ..... |
| Mafa-F*02:10    | .....        | .....                                                                                               | ..... | ..... | ..... | .....  | ..... | .....  | ..... | .....  | ..... |
| Mafa-F*02:11    | .....        | .....                                                                                               | ..... | ..... | ..... | .....  | ..... | .....  | ..... | .....  | ..... |
| Mafa-F*02:12    | .....        | .....                                                                                               | ..... | ..... | ..... | C..... | ..... | .....  | ..... | A..... | ..... |
| Mafa-F*021:3    | .....        | .....                                                                                               | ..... | ..... | ..... | .....  | ..... | C..... | ..... | .....  | ..... |
| Mafa-F*02:14    | .....        | .....                                                                                               | ..... | ..... | ..... | .....  | ..... | C..... | ..... | .....  | ..... |
| Mafa-F*02:15    | .....        | .....                                                                                               | ..... | ..... | ..... | .....  | ..... | .....  | ..... | A..... | ..... |
| Mafa-F*02:16    | .....        | .....                                                                                               | ..... | ..... | ..... | .....  | ..... | .....  | ..... | A..... | ..... |
| Mafa-F*02:17    | .....        | .....                                                                                               | ..... | ..... | ..... | .....  | ..... | .....  | ..... | .....  | ..... |
| Mafa-F*02:18    | .....        | .....                                                                                               | ..... | ..... | ..... | .....  | ..... | C..... | ..... | .....  | ..... |
| Mafa-F*02:19    | .....        | .....                                                                                               | ..... | ..... | ..... | .....  | ..... | C..... | ..... | .....  | ..... |
| Mafa-F*02:20    | .....        | .....                                                                                               | ..... | ..... | ..... | .....  | ..... | .....  | ..... | A..... | ..... |
| Mafa-F*02:21    | .....        | .....                                                                                               | ..... | ..... | ..... | .....  | ..... | C..... | ..... | .....  | ..... |
| Mafa-F*02:22    | .....        | .....                                                                                               | ..... | ..... | ..... | .....  | ..... | .....  | ..... | .....  | ..... |
| Mamu-F*02:01    | .....        | .....                                                                                               | ..... | ..... | ..... | .....  | ..... | .....  | ..... | .....  | ..... |
| Mamu-F*02:02    | .....        | .....                                                                                               | ..... | ..... | ..... | .....  | ..... | .....  | ..... | .....  | ..... |
| Mamu-F*02:03:01 | .....        | .....                                                                                               | ..... | ..... | ..... | .....  | ..... | .....  | ..... | A..... | ..... |
| Mamu-F*02:04:01 | .....        | .....                                                                                               | ..... | ..... | ..... | .....  | ..... | .....  | ..... | .....  | ..... |
| Mamu-F*02:07:01 | .....        | .....                                                                                               | ..... | ..... | ..... | .....  | ..... | .....  | ..... | A..... | ..... |
| Mamu-F*02:08:01 | .....        | .....                                                                                               | ..... | ..... | ..... | .....  | ..... | .....  | ..... | .....  | ..... |
| Mamu-F*02:09    | .....        | .....                                                                                               | ..... | ..... | ..... | .....  | ..... | C..... | ..... | .....  | ..... |
| Mamu-F*02:10    | .....        | .....                                                                                               | ..... | ..... | ..... | .....  | ..... | .....  | ..... | A..... | ..... |
| Mamu-F*02:11    | .....        | .....                                                                                               | ..... | ..... | ..... | .....  | ..... | .....  | ..... | A..... | ..... |
| Mamu-F*02:12    | .....        | .....                                                                                               | ..... | ..... | ..... | .....  | ..... | .....  | ..... | .....  | ..... |
| Mamu-F*02:13    | .....        | .....                                                                                               | ..... | ..... | ..... | .....  | ..... | .....  | ..... | A..... | ..... |
| Mamu-F*02:14    | .....        | .....                                                                                               | ..... | ..... | ..... | .....  | ..... | .....  | ..... | A..... | ..... |
| Mamu-F*02:15    | .....        | .....                                                                                               | ..... | ..... | ..... | .....  | ..... | .....  | ..... | .....  | ..... |
| Mamu-F*02:16    | .....        | .....                                                                                               | ..... | ..... | ..... | .....  | ..... | .....  | ..... | A..... | ..... |
| Mamu-F*02:17    | .....        | .....                                                                                               | ..... | ..... | ..... | .....  | ..... | .....  | ..... | .....  | ..... |
| Mamu-F*02:18    | .....        | .....                                                                                               | ..... | ..... | ..... | .....  | ..... | .....  | ..... | A..... | ..... |
